# Supplementary material for: Cyanobacteria Application Ameliorates Floral Traits and Outcrossing Rate in Diverse Rice Cytoplasmic Male Sterile Lines
Source: MDPI journal article supplement (doi:10.3390/plants11243411), 2022-12-07
Supplement: s1 [file s1]

**Table S1.** Physical and chemical soil characteristics at the experimental site, during 2020 and 2021 growing seasons

| Characteristics                                     | 2020   | 2021   |
|-----------------------------------------------------|--------|--------|
| Soil particles distribution                         |        |        |
| Sand (%)                                            | 15.35  | 14.78  |
| Silt (%)                                            | 33.18  | 32.47  |
| Clay (%)                                            | 51.48  | 52.71  |
| Soil texture                                        | Clayey | Clayey |
| pH (1: 2.5 water suspension)                        | 8.04   | 8.16   |
| EC (dS m <sup>-1</sup> )                            | 2.29   | 2.55   |
| Organic matter                                      | 1.64   | 1.57   |
| Soluble cations and anions (mmolc L <sup>-1</sup> ) |        |        |
| Ca <sup>2+</sup>                                    | 10.69  | 10.1   |
| Mg <sup>2+</sup>                                    | 4.22   | 3.95   |
| K <sup>+</sup>                                      | 1.93   | 1.80   |
| Na <sup>+</sup>                                     | 14.00  | 13.10  |
| HCO <sub>3</sub> <sup>-</sup>                       | 13.60  | 15.50  |
| Cl <sup>-</sup>                                     | 8.50   | 7.40   |
| SO <sub>4</sub> <sup>2-</sup>                       | 8.60   | 7.60   |
| CO <sub>3</sub> <sup>2-</sup>                       | 0.0    | 0.0    |

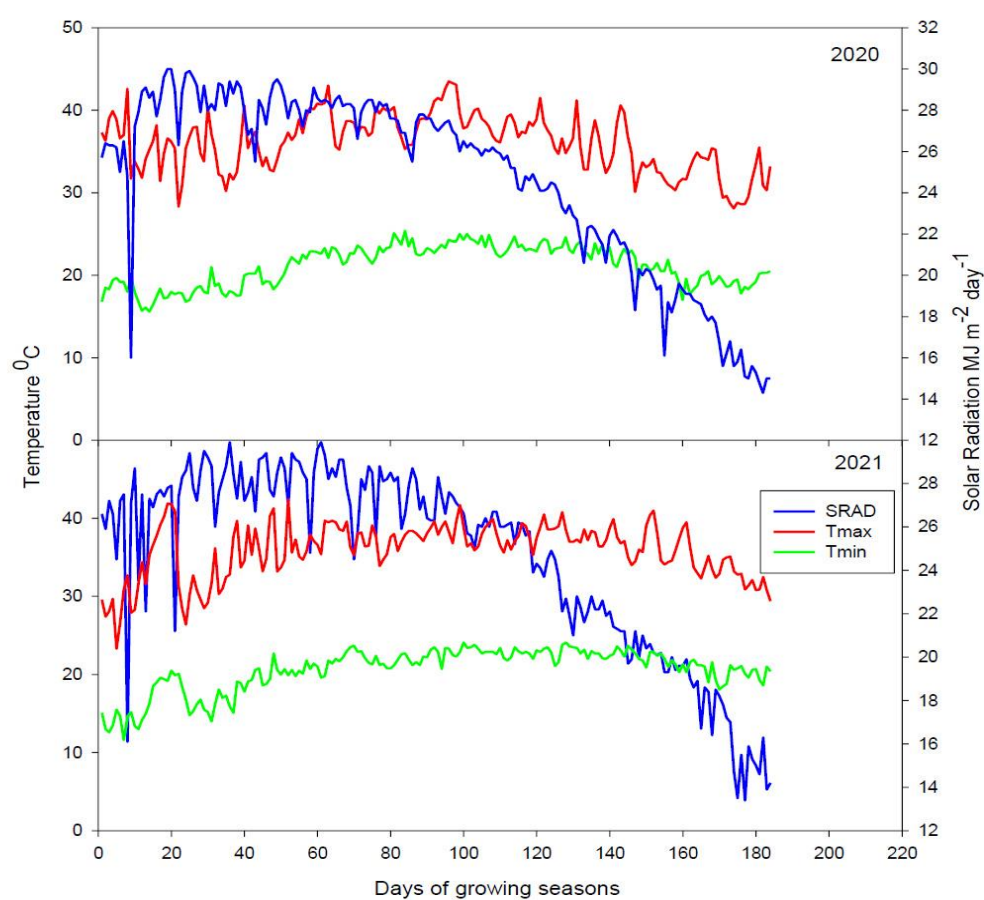

**Figure S1.** Certain meteorological data at the experimental site in the two summer seasons of 2020 and 2021.

**Table S2.** Influence of interaction between cyanobacteria and CMS lines on days to heading (DTH), spikelet opening angle (SOA), duration of spikelet opening (DSO), total stigma length (TSL) and stigma width (SW) of CMS lines

| CMS line   | Treat<br>ment | DTH (50%) |         | SOA (°) |         | DSO (min) |         | TSL (mm) |       | SW (mm) |       |
|------------|---------------|-----------|---------|---------|---------|-----------|---------|----------|-------|---------|-------|
|            |               | 2020      | 2021    | 2020    | 2021    | 2020      | 2021    | 2020     | 2021  | 2020    | 2021  |
| L1 (A1×B1) | T1            | 105.46k   | 106.75j | 23.07h  | 24.94g  | 125.45m   | 131.70m | 1.44n    | 1.48n | 0.26o   | 0.28o |
|            | T2            | 106.40g   | 107.75g | 24.24f  | 26.11f  | 129.63j   | 135.88j | 1.45m    | 1.49m | 0.30n   | 0.32n |
|            | T3            | 107.36f   | 108.65f | 26.57d  | 28.44d  | 145.36g   | 151.61g | 1.48l    | 1.52l | 0.32m   | 0.34m |
|            | T4            | 108.06e   | 110.48d | 28.59a  | 30.46a  | 160.49b   | 166.74b | 1.54i    | 1.57i | 0.35l   | 0.37l |
| L2 (A2×B2) | T1            | 89.89p    | 91.18p  | 22.63hi | 24.52hi | 114.41o   | 120.66o | 1.52j    | 1.55j | 0.37j   | 0.39j |
|            | T2            | 90.39o    | 91.68o  | 23.87fg | 25.74fg | 133.62i   | 139.86i | 1.56g    | 1.60g | 0.39i   | 0.42i |
|            | T3            | 90.99n    | 92.28n  | 25.77e  | 27.64e  | 151.62e   | 157.86e | 1.59e    | 1.63e | 0.41h   | 0.43h |
|            | T4            | 91.59m    | 92.88m  | 27.58b  | 29.45b  | 155.22c   | 161.47c | 1.60e    | 1.64e | 0.43e   | 0.45e |
| L3 (A3×B3) | T1            | 88.49t    | 89.78t  | 20.75m  | 22.62m  | 108.76p   | 115.01p | 1.50k    | 1.54k | 0.36k   | 0.38k |
|            | T2            | 88.79s    | 90.08s  | 22.02k  | 23.89k  | 128.60k   | 134.85j | 1.58f    | 1.62f | 0.42f   | 0.44f |
|            | T3            | 89.29r    | 90.58r  | 23.58g  | 25.45g  | 133.25i   | 139.50i | 1.62d    | 1.66d | 0.43e   | 0.45e |
|            | T4            | 89.69q    | 90.98p  | 25.44e  | 27.31e  | 138.55h   | 144.80h | 1.65b    | 1.69b | 0.45d   | 0.47d |
| L4 (A4×B4) | T1            | 109.19d   | 110.48d | 19.00o  | 20.87o  | 98.75q    | 105.00q | 1.43o    | 1.47o | 0.45d   | 0.47d |
|            | T2            | 109.99c   | 111.28c | 19.66n  | 21.53n  | 113.75o   | 120.00o | 1.58f    | 1.62f | 0.48c   | 0.50c |
|            | T3            | 110.49b   | 111.78b | 21.32l  | 23.19l  | 120.16n   | 126.41o | 1.64c    | 1.68c | 0.50b   | 0.52b |
|            | T4            | 111.09a   | 112.38a | 22.56ij | 24.43ij | 126.18l   | 132.43l | 1.68a    | 1.72a | 0.53a   | 0.55a |
| L5 (A5×B5) | T1            | 104.38l   | 105.67l | 22.18jk | 24.05jk | 124.91m   | 131.16m | 1.36q    | 1.40q | 0.41g   | 0.43g |
|            | T2            | 104.88k   | 106.17k | 24.02fg | 25.89fg | 149.06f   | 155.31f | 1.41p    | 1.45p | 0.42f   | 0.44f |
|            | T3            | 105.48i   | 106.77i | 27.03c  | 28.90c  | 154.36d   | 160.61d | 1.45m    | 1.49m | 0.43e   | 0.44f |
|            | T4            | 105.88h   | 107.17h | 28.63a  | 30.50a  | 164.58a   | 170.83a | 1.55h    | 1.59h | 0.45d   | 0.47d |

T1: untreated control, T2: *Anabaena Oryzae*, T3: *Nostoc muscorum*, T4: the combination between T2 and T3. Different lowercase letter within a column indicates significant difference among the CMS lines within each growth regulator at  $p < 0.05$ .

**Table S3.** Influence of interaction between application of cyanobacteria and CMS lines on flag leaf angle (FLA), plant height (PH), panicle length (PL), panicle exertion (PE) and leaf area index (LAI) of CMS lines

| CMS line   | Treat<br>ment | FLA (°) |        | PH (cm) |         | PL (cm) |        | PE (%) |        | LAI (cm) |          |
|------------|---------------|---------|--------|---------|---------|---------|--------|--------|--------|----------|----------|
|            |               | 2020    | 2021   | 2020    | 2021    | 2020    | 2021   | 2020   | 2021   | 2020     | 2021     |
| L1 (A1×B1) | T1            | 25.33h  | 24.52h | 95.63q  | 97.68q  | 21.33l  | 22.62l | 38.80t | 36.95t | 29.08f   | 26.58f   |
|            | T2            | 26.12g  | 25.31g | 97.63o  | 99.68o  | 21.93k  | 23.22k | 45.80q | 43.95q | 30.98def | 28.48def |
|            | T3            | 28.03e  | 27.52e | 99.93l  | 101.98l | 22.43j  | 23.72j | 53.80j | 51.95j | 31.09def | 28.59def |
|            | T4            | 31.23c  | 30.42c | 100.89h | 102.94i | 22.44i  | 23.73i | 62.80a | 60.95a | 30.29ef  | 27.79ef  |
| L2 (A2×B2) | T1            | 24.77h  | 23.90h | 98.43m  | 100.48m | 20.17p  | 21.46p | 40.13s | 38.27s | 32.32c-f | 29.82c-f |
|            | T2            | 28.03e  | 27.22e | 100.03k | 102.08k | 20.57o  | 22.22n | 43.13r | 41.27r | 33.22b-f | 30.72b-f |
|            | T3            | 29.93d  | 29.12d | 101.83h | 103.88h | 20.93n  | 22.22n | 47.63o | 45.77o | 34.62a-e | 32.12a-e |
|            | T4            | 31.73c  | 30.92c | 103.61f | 105.66f | 21.22m  | 22.51m | 54.27i | 53.37h | 32.74b-f | 30.24b-f |
| L3 (A3×B3) | T1            | 23.27i  | 22.46i | 89.28t  | 91.34t  | 18.06t  | 19.35t | 48.42n | 46.57n | 16.15g   | 13.64g   |
|            | T2            | 27.88e  | 27.07e | 91.18s  | 93.23s  | 18.26s  | 19.55s | 52.78l | 50.93l | 17.64g   | 15.15g   |
|            | T3            | 26.17g  | 25.36g | 93.78r  | 95.84r  | 18.46r  | 19.75r | 58.38e | 56.53e | 17.1g    | 14.65g   |
|            | T4            | 28.33e  | 27.66e | 96.78p  | 98.84q  | 18.66q  | 19.95q | 62.68b | 60.83b | 19.05g   | 16.54g   |
| L4 (A4×B4) | T1            | 30.41d  | 29.61d | 104.45e | 106.50e | 23.31h  | 24.60h | 47.56p | 45.70p | 35.24a-d | 32.74a-d |
|            | T2            | 31.42c  | 30.62c | 106.35c | 108.40c | 23.66f  | 24.95f | 53.56k | 51.71k | 36.74abc | 34.24abc |
|            | T3            | 33.31b  | 32.51b | 108.35b | 110.40b | 24.01b  | 25.30b | 56.27f | 54.42f | 37.24ab  | 34.74ab  |
|            | T4            | 35.71a  | 34.91a | 111.15a | 113.20a | 24.36a  | 25.65a | 61.45d | 59.61d | 39.04a   | 36.54a   |
| L5 (A5×B5) | T1            | 26.94f  | 26.13f | 98.37n  | 100.42n | 23.58g  | 24.87g | 50.27m | 48.43m | 29.23f   | 26.73f   |
|            | T2            | 27.94f  | 27.13e | 100.16j | 102.21j | 23.70e  | 24.99e | 54.27i | 52.43i | 30.73def | 28.23def |
|            | T3            | 30.04d  | 29.23d | 102.16g | 104.21j | 23.82d  | 25.30b | 56.28f | 54.53f | 32.0def  | 28.50def |
|            | T4            | 33.24b  | 32.43b | 105.16d | 107.20d | 23.94c  | 25.23c | 61.57c | 59.73c | 32.80b-f | 30.30b-f |

**Table S4.** Influence of interaction between the application of cyanobacteria and CMS lines on number of fertile panicles per hill (NFPH), seed set (SS) and grain yield (GY) of CMS lines

| CMS line   | Treatment | NFPH (n) |          | SS (%) |        | GY (ton/ha) |         |
|------------|-----------|----------|----------|--------|--------|-------------|---------|
|            |           | 2020     | 2021     | 2020   | 2021   | 2020        | 2021    |
| L1 (A1×B1) | T1        | 13.14m   | 15.12m   | 24.40m | 23.11m | 0.554s      | 0.706q  |
|            | T2        | 14.58k   | 16.56k   | 30.20h | 28.91h | 0.752l      | 0.904l  |
|            | T3        | 16.35g   | 18.33g   | 34.50e | 33.21e | 1.005e      | 1.157e  |
|            | T4        | 18.08c   | 20.06c   | 39.10c | 37.81c | 1.161b      | 1.313be |
| L2 (A2×B2) | T1        | 13.93l   | 15.92l   | 22.43n | 21.14n | 0.639o      | 0.791o  |
|            | T2        | 15.52i   | 17.49i   | 28.03j | 26.74j | 0.835j      | 0.987j  |
|            | T3        | 17.84cd  | 19.82cd  | 32.76f | 31.47f | 1.005e      | 1.157e  |
|            | T4        | 20.06a   | 22.04a   | 36.97d | 35.68d | 1.128c      | 1.280c  |
| L3 (A3×B3) | T1        | 13.34m   | 15.32m   | 22.04n | 20.75n | 0.502s      | 0.654s  |
|            | T2        | 15.12j   | 17.10j   | 26.74l | 25.45l | 0.638p      | 0.790p  |
|            | T3        | 17.22f   | 19.20f   | 31.56g | 30.27g | 0.797k      | 0.949k  |
|            | T4        | 18.52b   | 20.50b   | 34.52e | 33.23e | 0.922g      | 1.074g  |
| L4 (A4×B4) | T1        | 15.86h   | 17.84h   | 29.22i | 27.92i | 0.689n      | 0.841n  |
|            | T2        | 17.46ef  | 19.44ef  | 34.23e | 32.93e | 0.849i      | 1.001i  |
|            | T3        | 17.76cde | 19.73cde | 39.82b | 38.53b | 1.034d      | 1.186d  |
|            | T4        | 20.36a   | 22.34a   | 45.72a | 44.43a | 1.264a      | 1.416a  |
| L5 (A5×B5) | T1        | 12.44n   | 14.42n   | 27.16k | 25.87k | 0.521r      | 0.673r  |
|            | T2        | 13.94l   | 15.92l   | 31.56g | 30.27g | 0.690m      | 0.843m  |
|            | T3        | 15.04j   | 17.02j   | 34.61e | 33.32e | 0.849h      | 1.013h  |
|            | T4        | 17.54def | 19.52def | 37.05d | 35.68d | 0.963f      | 1.114f  |

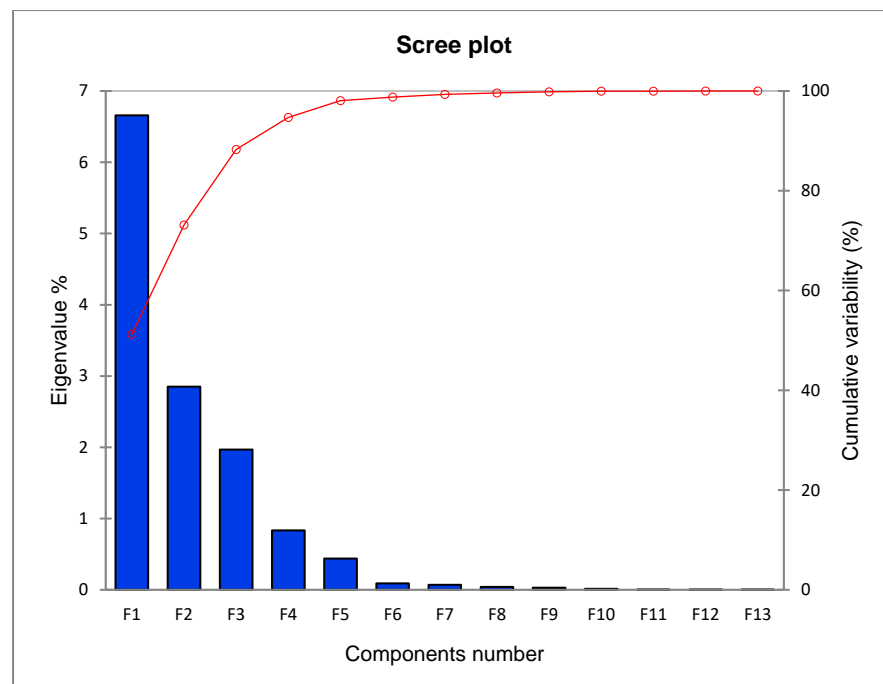

**Figure S2.** Scree plot of PCA between respective eigenvalues %, components number and cumulative variability (%).
